# Supplementary material for: Uniform nucleation and growth of Cs3Cu2I5nanocrystals with high luminous efficiency and structural stability and their application in white light-emitting diodes
Source: Royal Society of Chemistry journal article supplement (doi:10.1039/d3nr02542j), 2023-01-01
Supplement: d3nr02542j1.pdf [file d3nr02542j1.pdf]

# Uniform nucleation and growth of $\text{Cs}_3\text{Cu}_2\text{I}_5$ nanocrystals with high luminous efficiency and structured stability and their application in white light-emitting diodes

Zirui Liu,<sup>†,a</sup> Wei Li,<sup>†,a</sup> Lin Wang,<sup>\*,a</sup> Fei Zhang,<sup>b</sup> Sheng Wang,<sup>a</sup> Junchuan Liu,<sup>a</sup>

Chengxi Zhang,<sup>a</sup> Luqiao Yin,<sup>a</sup> Guohua Jia,<sup>c</sup> Zhifeng Shi<sup>\*,b</sup> and Xuyong Yang<sup>\*,a</sup>

a. Key Laboratory of Advanced Display and System Applications of Ministry of Education, Shanghai University, 149 Yanchang Road, Shanghai 200072, China.

Email: [lin\\_wang@shu.edu.cn](mailto:lin_wang@shu.edu.cn); [yangxy@shu.edu.cn](mailto:yangxy@shu.edu.cn).

b. Key Laboratory of Materials Physics of Ministry of Education, School of Physics and Microelectronics, Zhengzhou University, Daxue Road 75, Zhengzhou 450052, China. E-mail: [shizf@zzu.edu.cn](mailto:shizf@zzu.edu.cn).

c. School of Molecular and Life Sciences, Curtin University, Perth, WA 6102, Australia.

**Keywords** : copper-based ternary halides, uniform nucleation, stable, white light-emitting diodes

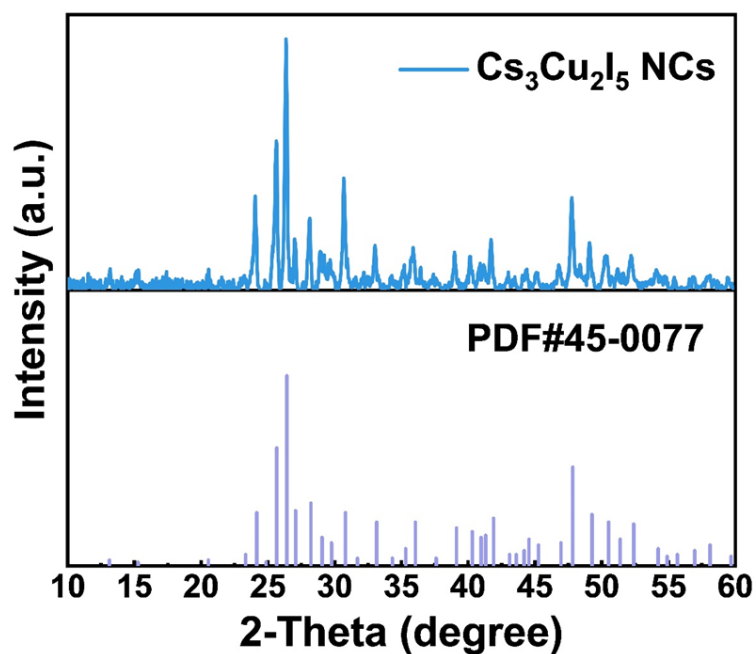

**Figure S1.** XRD of Cs<sub>3</sub>Cu<sub>2</sub>I<sub>5</sub> NCs and standard PDF card of Cs<sub>3</sub>Cu<sub>2</sub>I<sub>5</sub>.

**Table S1.** Summary of elemental contents of Cs, Cu, and I in Cs<sub>3</sub>Cu<sub>2</sub>I<sub>5</sub> NCs.

| Element    | Cs    | Cu    | I     |
|------------|-------|-------|-------|
| Weight (%) | 29.66 | 24.28 | 46.06 |

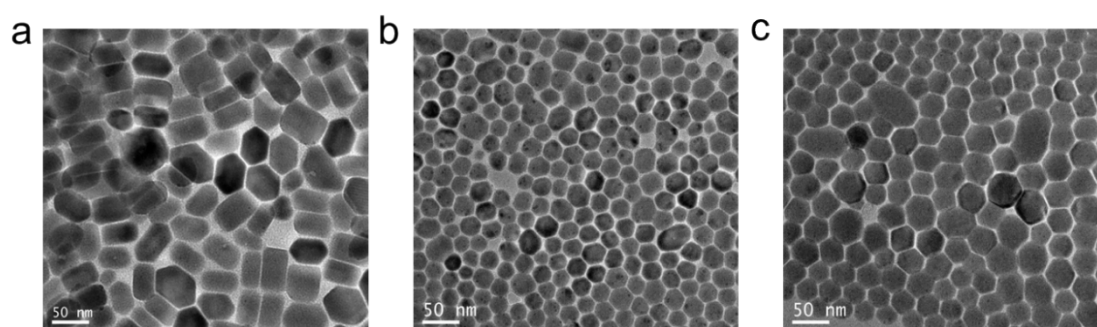

**Figure S2.** TEM images of Cs<sub>3</sub>Cu<sub>2</sub>I<sub>5</sub> NCs prepared by high-energy ultrasound method for (a) 1 min, (b) 2 min and (c) 5 min.

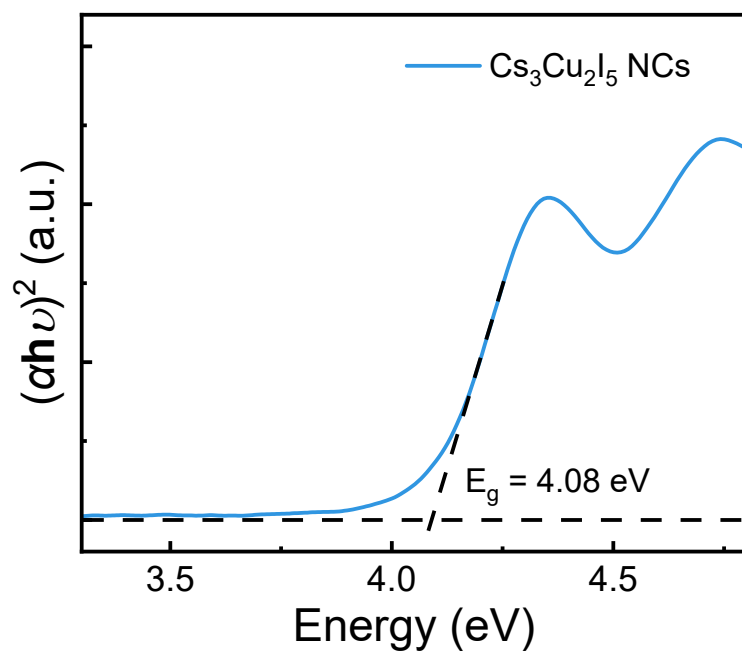

**Figure S3.** Tauc plot of the Cs<sub>3</sub>Cu<sub>2</sub>I<sub>5</sub> NCs.

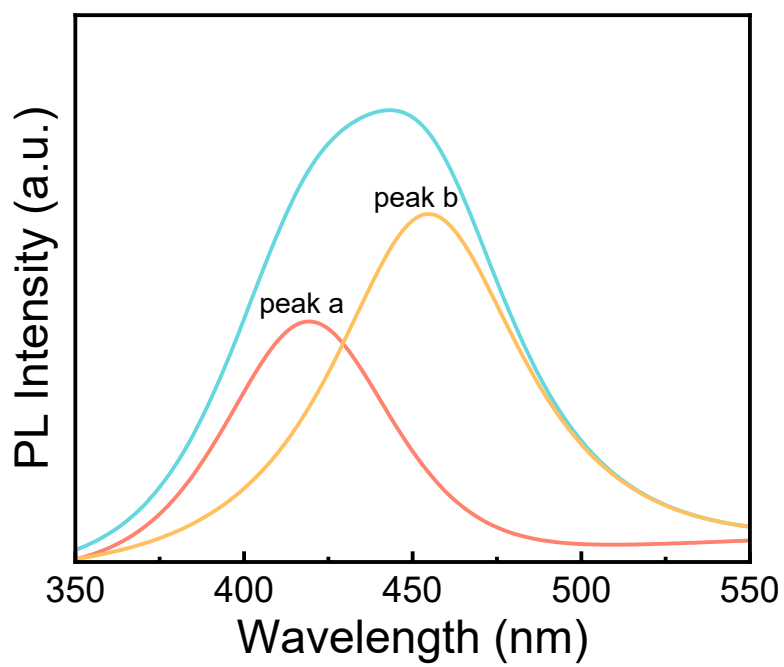

**Figure S4.** The PL spectra and the fitting results of Cs<sub>3</sub>Cu<sub>2</sub>I<sub>5</sub> NCs.

**Table S2.** Summary of fitting data of PL decay curve.

| Samples                                             | $\tau_1$ (ns) | A <sub>1</sub> (%) | $\tau_2$ (ns) | A <sub>2</sub> (%) | $\tau_{avg}$ (ns) |
|-----------------------------------------------------|---------------|--------------------|---------------|--------------------|-------------------|
| Cs <sub>3</sub> Cu <sub>2</sub> I <sub>5</sub> -NCs | 124           | 0.16               | 1072          | 0.84               | 1051              |

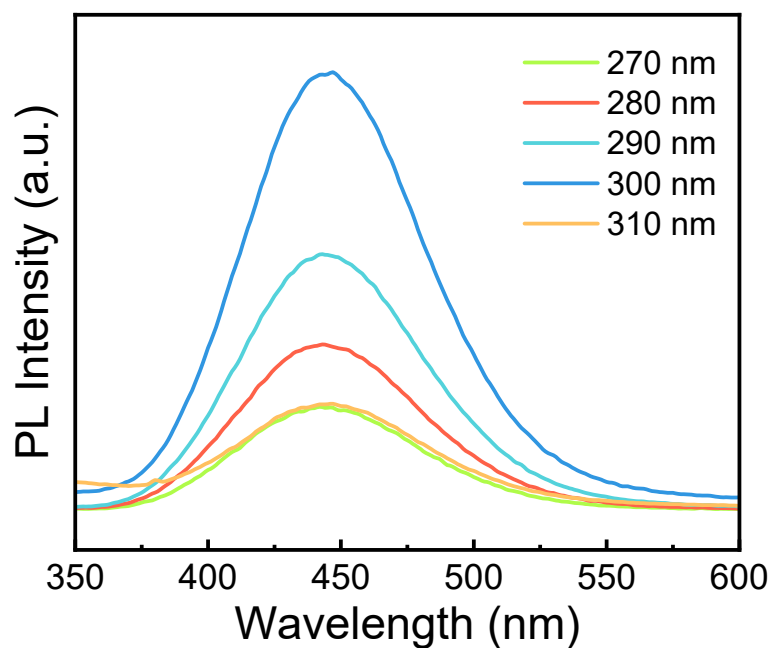**Figure S5.** PL spectra of Cs<sub>3</sub>Cu<sub>2</sub>I<sub>5</sub> NCs under different excitation wavelengths from 270 to 310 nm.**Table S3.** Summary of the properties Cs<sub>3</sub>Cu<sub>2</sub>I<sub>5</sub> NCs in literatures.

| NCs                                            | PL peak (nm) | PLQY (%) | Ref |
|------------------------------------------------|--------------|----------|-----|
| Cs <sub>3</sub> Cu <sub>2</sub> I <sub>5</sub> | 445          | 73.7     | 1   |
| Cs <sub>3</sub> Cu <sub>2</sub> I <sub>5</sub> | 445          | 72.6     | 2   |
| Cs <sub>3</sub> Cu <sub>2</sub> I <sub>5</sub> | 445          | 78.42    | 3   |
| Cs <sub>3</sub> Cu <sub>2</sub> I <sub>5</sub> | 447          | 72.4     | 4   |
| Cs <sub>3</sub> Cu <sub>2</sub> I <sub>5</sub> | 445          | 59       | 5   |
| Cs <sub>3</sub> Cu <sub>2</sub> I <sub>5</sub> | 445          | 39.8     | 6   |

|                                    |     |    |          |
|------------------------------------|-----|----|----------|
| $\text{Cs}_3\text{Cu}_2\text{I}_5$ | 395 | 10 | 7        |
| $\text{Cs}_3\text{Cu}_2\text{I}_5$ | 441 | 85 | Our work |

## References

1. L. Lian, M. Zheng, W. Zhang, L. Yin, *Adv. Sci.*, 2020, **7**, 2000195.
2. X. Hu, Y. Li, Y. Wu, W. Chen, H. Zeng, and X. Li, *Mater. Chem. Front.*, 2021, **5**, 6152-6159
3. X. Hu, P. Yan, P. Ran, L. Lu, *J. Phys. Chem. Lett.*, 2022, **13**, 2862–2870.
4. C. Li, S. Cho, D. Kim, and I. Park, *Chem. Mater.*, 2022, **34**, **15**, 6921–6932.
5. J. Zhou, K. An, P. He, J. Yang, et al, *Adv. Optical Mater.*, 2021, **9**, 2002144.
6. F. Zhang, W. Liang, L. Wang, Z. Ma, et al, *Adv. Funct. Mater.*, 2021, **31**, 2105771.
7. A. L. M. Freitas, A. Tofanello, F. P. Sabino, et al, *ACS Appl. Nano Mater.*, 2023, **6**, 7196–7205.

**Table S4.** Summary of the lead-free device performances of the prepared WLEDs.

| Emitter                                                   | CRI  | CCT (K)   | LE (lm/W) | Ref |
|-----------------------------------------------------------|------|-----------|-----------|-----|
| $(\text{CH}_6\text{N}_3)_2\text{MnCl}_4$                  | 93.7 | 3984      | 90.41     | 1   |
| $(\text{NH}_4)_2\text{Sn}_{1-x}\text{Te}_x\text{Cl}_6$    | 83   | 3855      | —         | 2   |
| $\text{Cs}_2\text{AgIn}_{0.9}\text{Bi}_{0.1}\text{Cl}_6$  | 94.5 | 6432      | —         | 3   |
| $(\text{C}_{13}\text{H}_{30}\text{N})_2\text{SnCl}_6$     | 96.7 | —         | —         | 4   |
| $\text{Cs}_2\text{SnCl}_6: \text{Bi}^{3+}/\text{Te}^{4+}$ | 94   | 6386-3668 | —         | 5   |
| $\text{Cs}_2\text{TeCl}_6: \text{Cr}^{3+}$                | 81.3 | 5826      | —         | 6   |
| $\text{Cs}_2\text{Zr}_{1-x}\text{Te}_x\text{Cl}_6$        | 74.8 | 4959      | 91.16     | 7   |
| $\text{OTA}_{2+x}\text{SnI}_{4+x}$                        | 92   | 2654      | —         | 8   |
| $\text{CsCu}_2\text{I}_3$                                 | 83   | 6718      | —         | 9   |

|                                                                                                         |      |      |      |           |
|---------------------------------------------------------------------------------------------------------|------|------|------|-----------|
| $\text{Cs}_2\text{NaInCl}_6:\text{Sb}^{3+}/\text{Sm}^{3+}/\text{Eu}^{3+}/\text{Tb}^{3+}/\text{Dy}^{3+}$ | 80   | 8035 | 37.5 | 10        |
| $(\text{OCTAm})_2\text{SnBr}_4$                                                                         | 89   | 6530 | —    | 11        |
| $(\text{Cs}_4\text{N}_2\text{H}_{14}\text{Br})_4\text{SnBr}_x\text{I}_{6-x}$                            | 84   | 5632 | 32.2 | 12        |
| $(\text{C}_4\text{N}_2\text{H}_{14}\text{Br})_4\text{SnBr}_6$                                           | 70   | 4946 | —    | 13        |
| $\text{Cs}_3\text{Cu}_2\text{I}_5/\text{CsCu}_2\text{I}_3$                                              | 89.5 | 5877 | 54.6 | 14        |
| $\text{Cs}_3\text{Cu}_2\text{I}_5$                                                                      | 95.3 | 5489 | 41.5 | This work |

## References

1. S. Wang, X. Han, T. Kou, et al, *J. Mater. Chem. C.*, 2021, **9**, 4895-4902.
2. Z. Li, C. Zhang, B. Li, C. Lin, Y. Li, L. Wang, R. Xie, *Chemical Engineering Journal.*, 2021, **420**, 129740.
3. Y. Zhang, Z. Zhang, W. Yu, et al, *Adv. Sci.*, 2022, **9**, 2102895.
4. W. Lin, Q. Wei, T. Huang, et al, *J. Mater. Chem. C*, 2023, Advance Article.
5. Z. Liu, X. Ji, Z. Ma, *Laser Photonics Rev.*, 2023, 2300094.
6. L. Zi, W. Xu, Z. Song, R. Sun, *J. Mater. Chem. C.*, 2023, **11**, 2695-2702.
7. Z. Li, Z. Rao, Q. Li, L. Zhou, X. Zhao, X. Gong, *Adv. Optical Mater.*, 2021, **9**, 2100804.
8. Z. Li, Z. Deng, A. Johnston, *Adv. Funct. Mater.*, 2022, **32**, 2111346.
9. W. Liu, K. W. Ng, H. Lin, Z. Dai, *J. Phys. Chem. C.*, 2021, **125**, 13076–13083.
10. X. Li, D. Wang, Y. Zhong, F. Jiang, *Adv. Sci.*, 2023, 2207571.
11. J. Sun, J. Yang, J. I. Lee, J. H. Cho, and M. S. Kang, *J. Phys. Chem. Lett.*, 2018, **9**, 1573–1583.
12. C. Zhou, Y. Tian, Z. Yuan, et al, *ACS Appl. Mater. Interfaces.*, 2017, **9**, 44579–44583.
13. C. Zhou, H. Lin, Y. Tian, Z. Yuan, *Chem. Sci.*, 2018, **9**, 586-593.
14. L. Wang, Z. Ma, F. Zhang, et al, *J. Mater. Chem. C.*, 2021, **9**, 6151-6159.
